# Supplementary material for: Epithelial and Mesenchymal-like Pancreatic Cancer Cells Exhibit Different Stem Cell Phenotypes Associated with Different Metastatic Propensities
Source: Cancers (Basel). 2024 Feb 6;16(4):686. doi: 10.3390/cancers16040686 (PMC10886860; doi:10.3390/cancers16040686)
Supplement: Supplementary file 1 [file cancers-16-00686-s001.zip]

Archive with 6 entries (6 files):
- Legends to Supplementary Figures_LMP.pdf
- Supplementary Figure S1.pdf
- Supplementary Figure S2.pdf
- Supplementary Figure S3.pdf
- Supplementary Figure S4.pdf
- Supplementary Figure S5.pdf
