# Supplementary material for: Epithelial and Mesenchymal-like Pancreatic Cancer Cells Exhibit Different Stem Cell Phenotypes Associated with Different Metastatic Propensities
Source: Cancers (Basel). 2024 Feb 6;16(4):686. doi: 10.3390/cancers16040686 (PMC10886860; doi:10.3390/cancers16040686)
Supplement: Supplementary file 1 [file cancers-16-00686-s001.zip › Supplementary Figure S1.pdf]

(A)

Parental PDAC cells

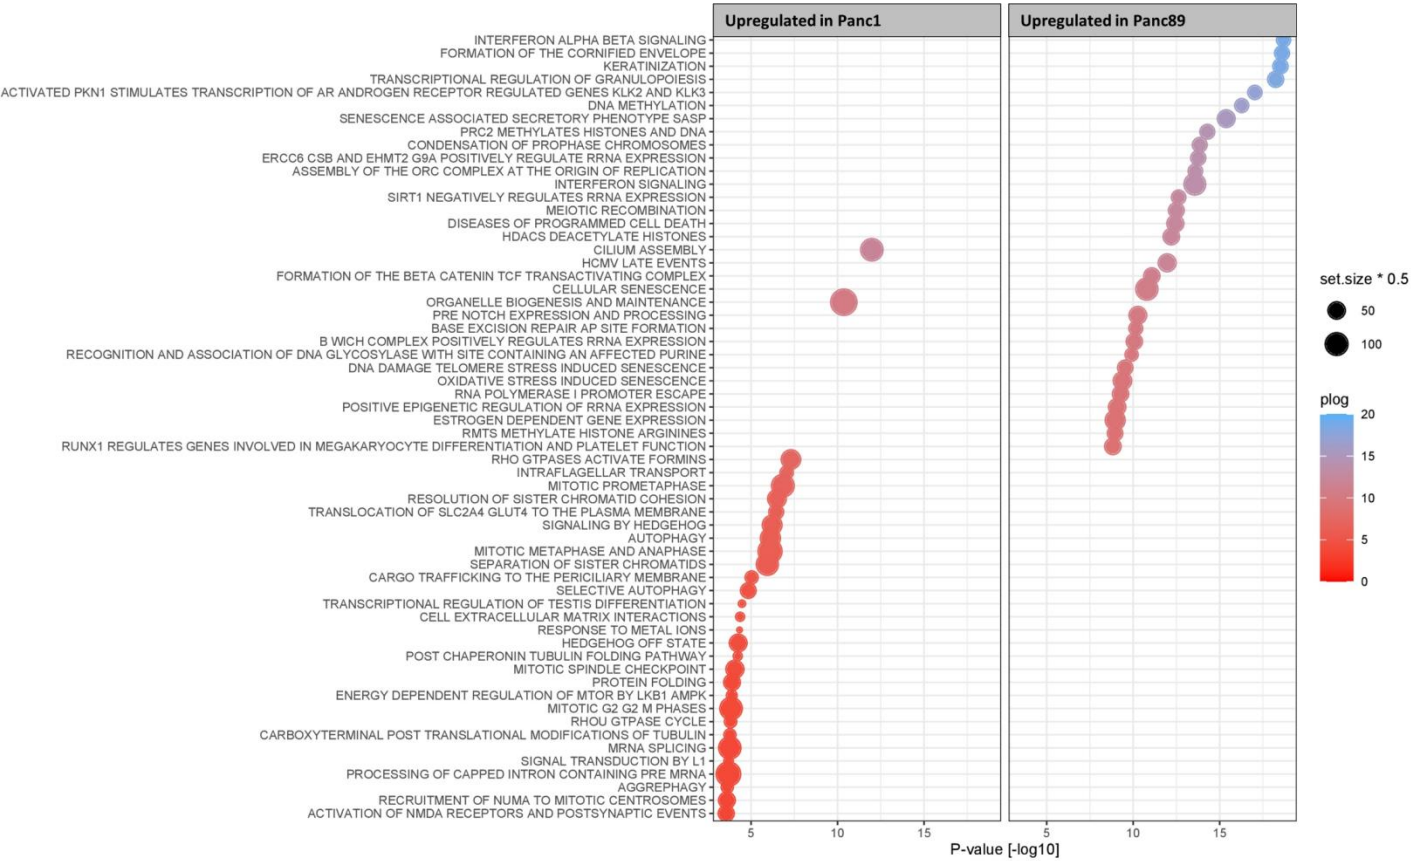

(B)

Panc1 cell clones

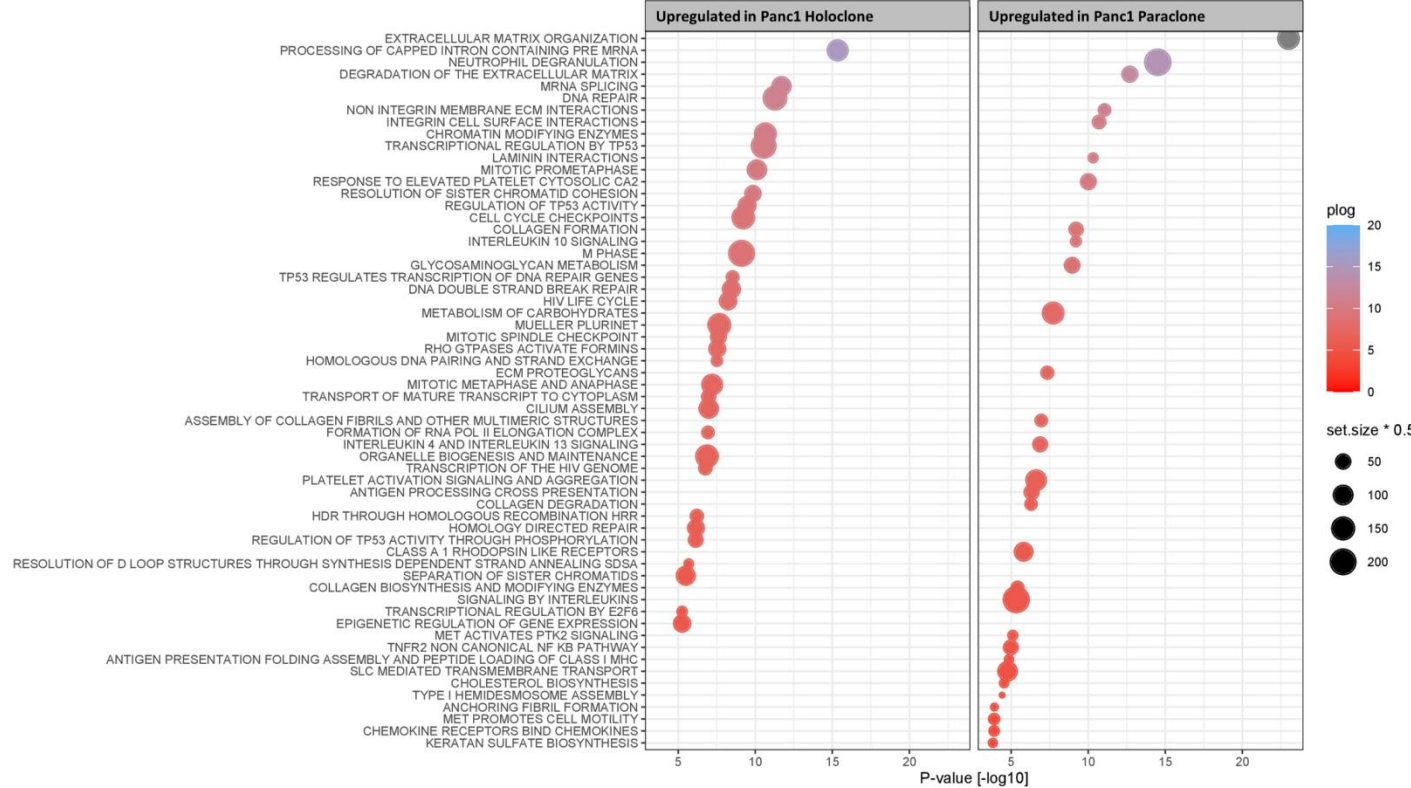

(C)

Panc89 cell clones

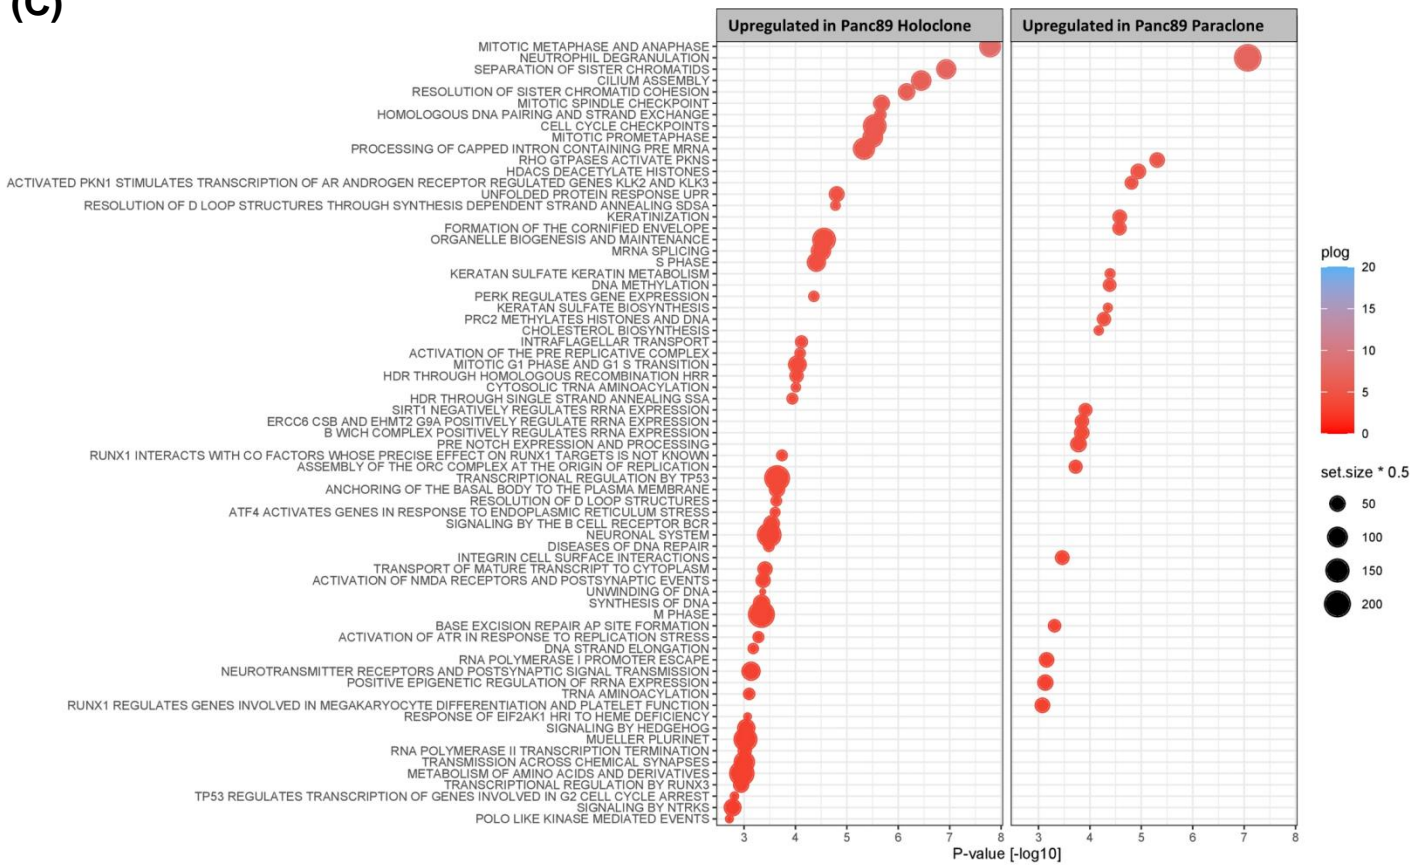

(D)

Top Classical-like  
parental cell lines

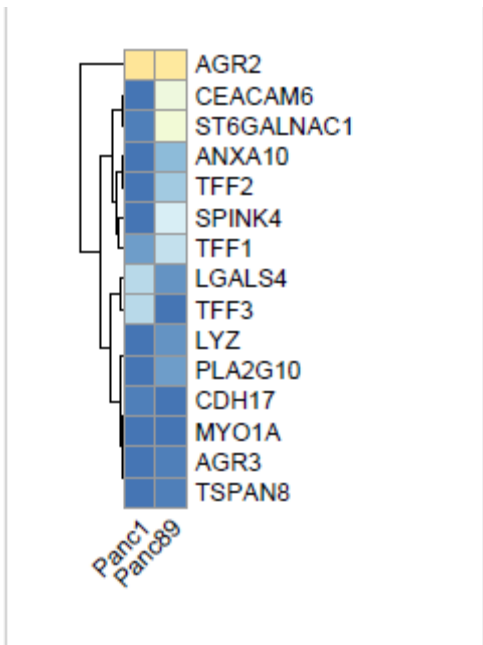

Top Basal-like  
parental cell lines

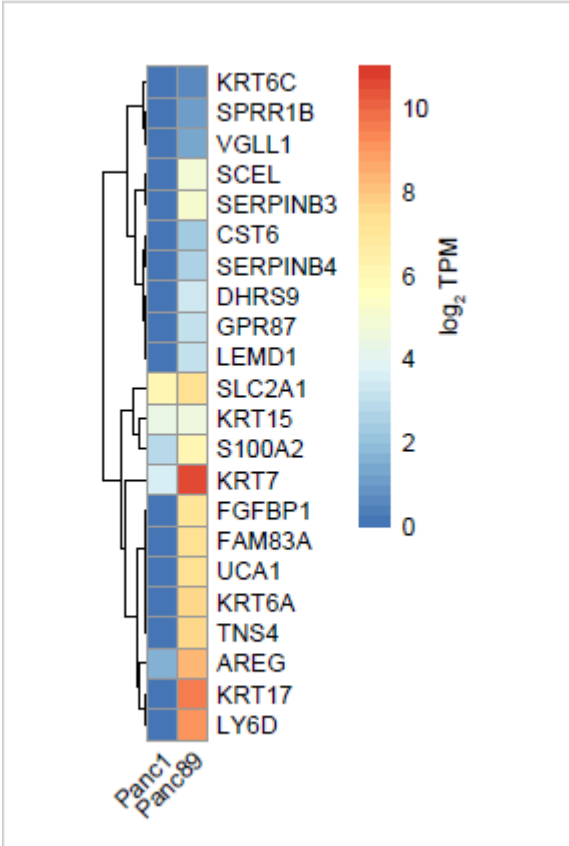

(E)

Top Basal-like  
clone variants

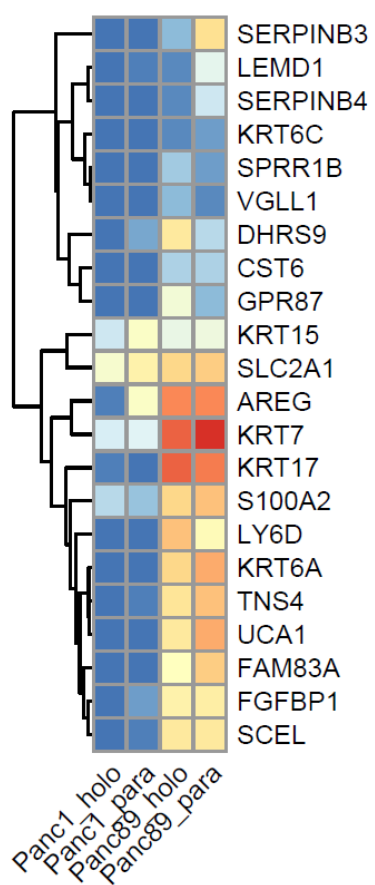

Supplementary Figure 1
