# Supplementary figures and images for: Epithelial and Mesenchymal-like Pancreatic Cancer Cells Exhibit Different Stem Cell Phenotypes Associated with Different Metastatic Propensities
Source: MDPI journal article supplement (doi:10.3390/cancers16040686), 2024-02-06

Total Panc89 Holoclone tumors

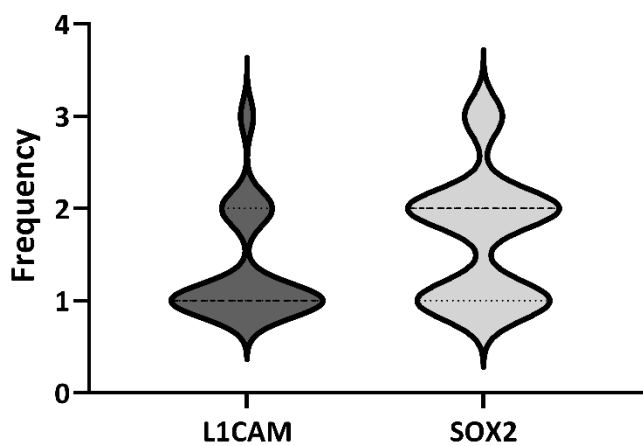

L1CAM high Panc89 Holoclone tumors

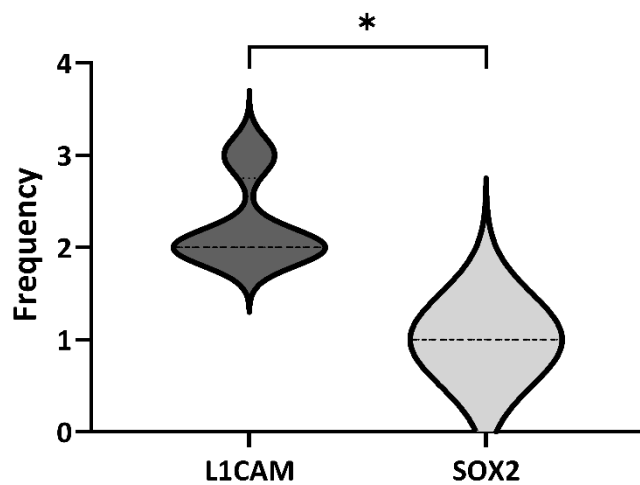

Supplement: s1 [file s1]

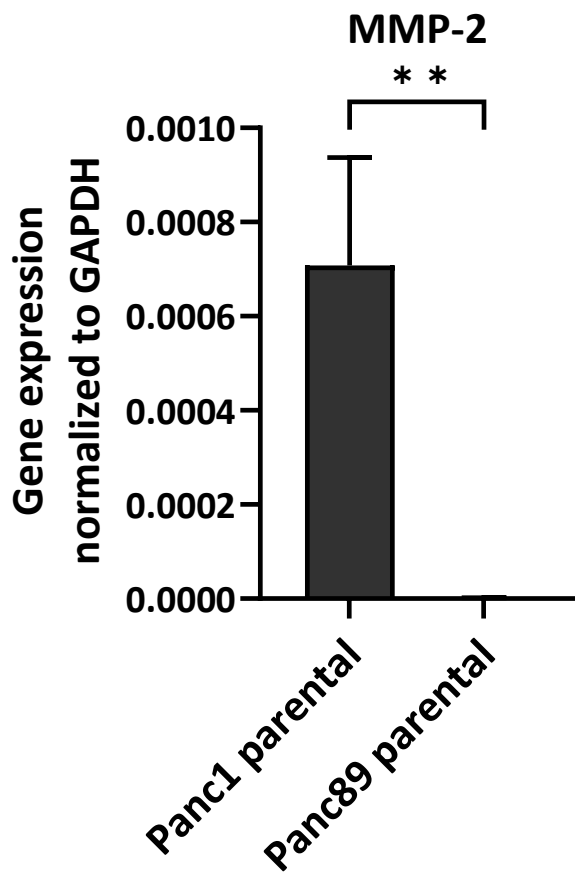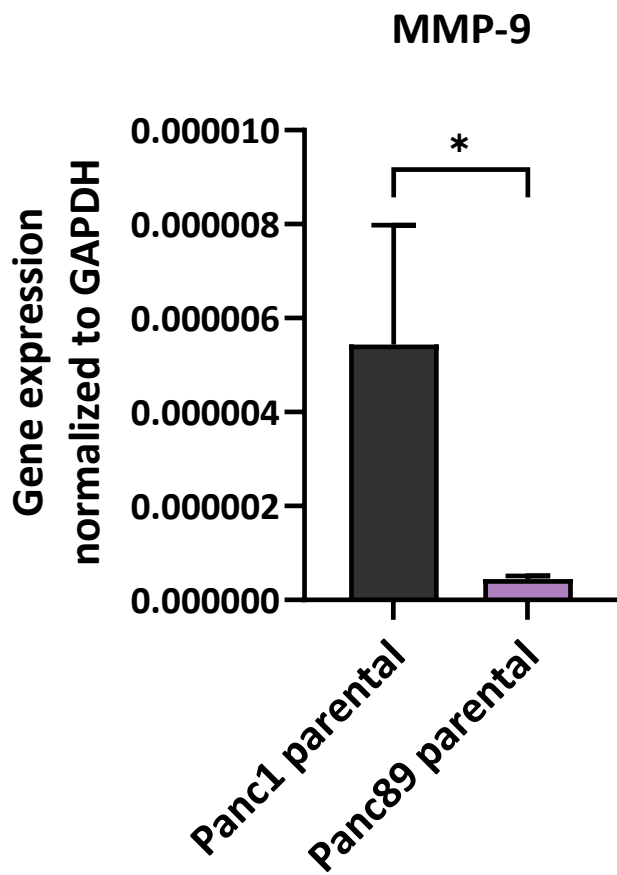

Supplement: s1 [file s1]

(A)

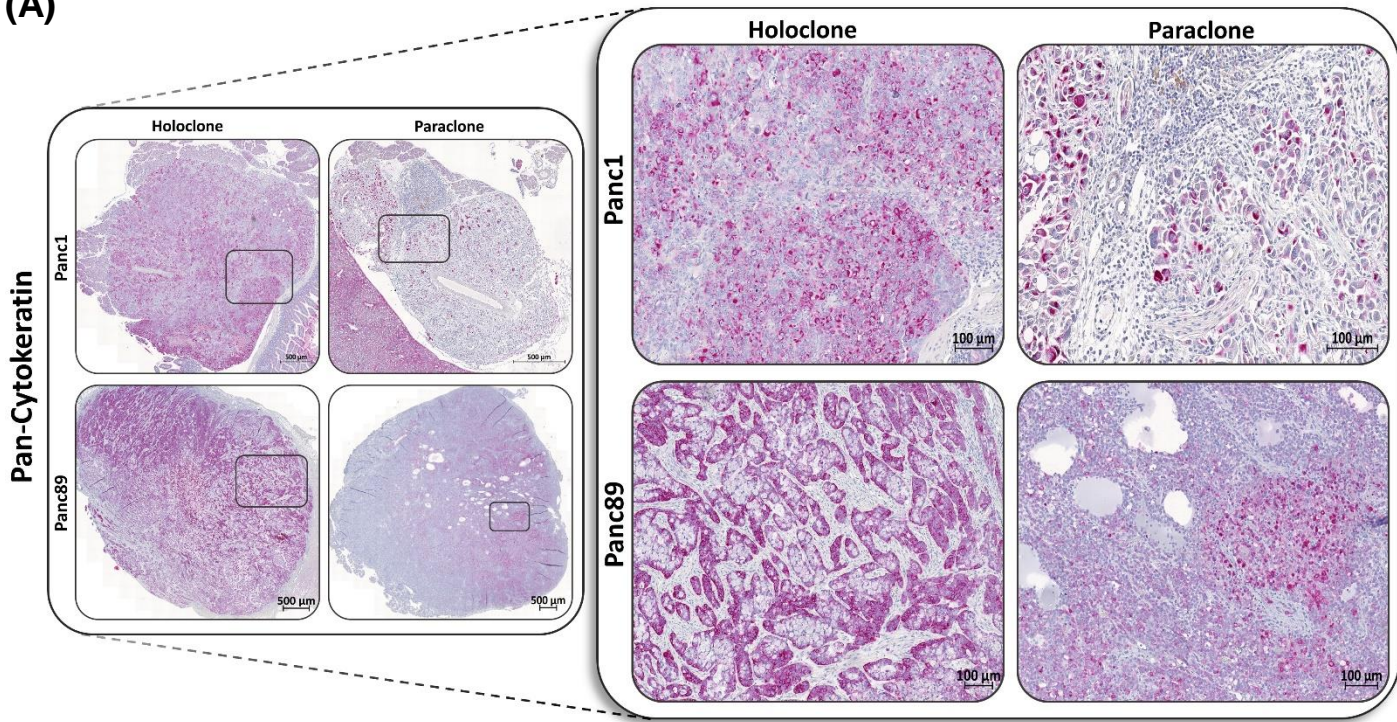

(B)

Cyst formation in Panc89 Paraclone tumors

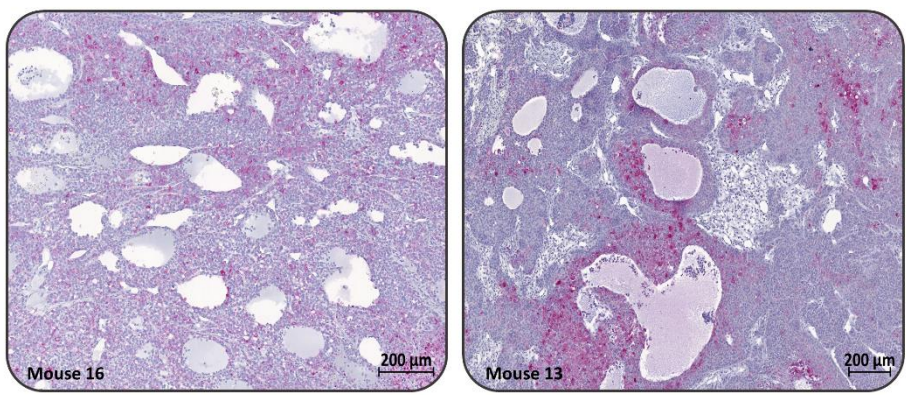

Supplement: s1 [file s1]

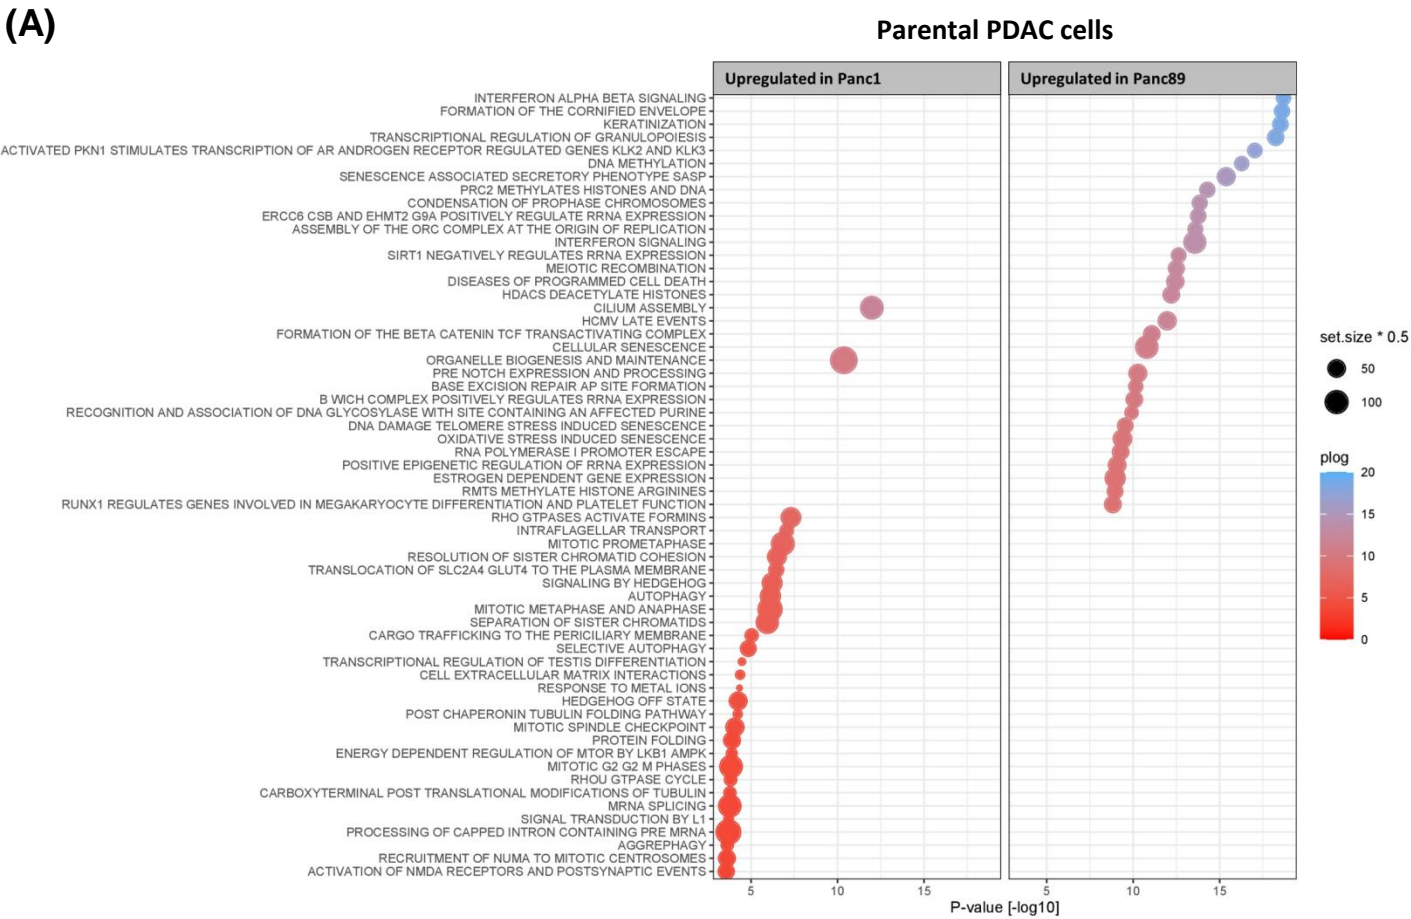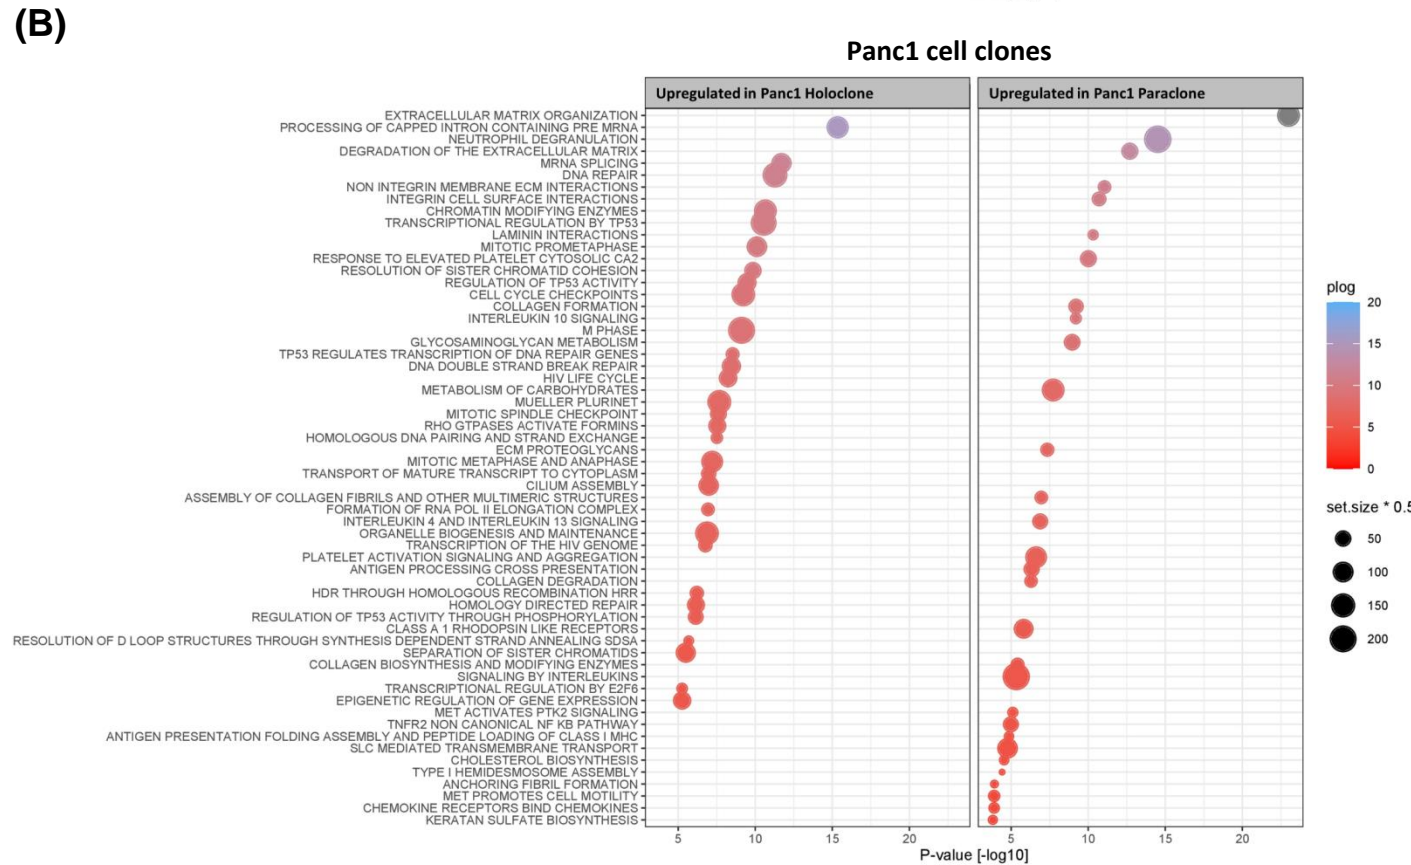

**Supplementary Figure 1**

(C)

Panc89 cell clones

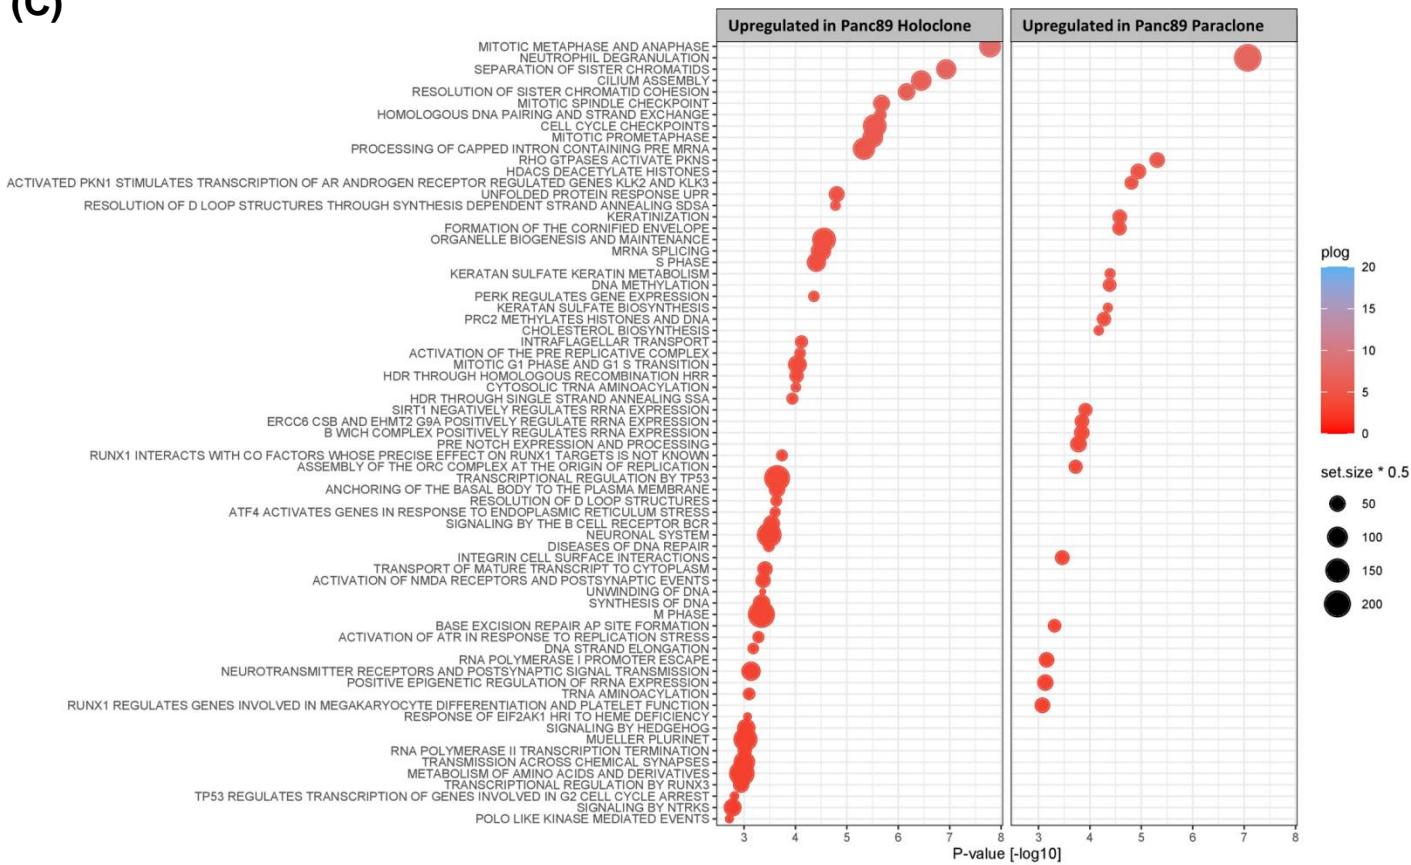

(D)

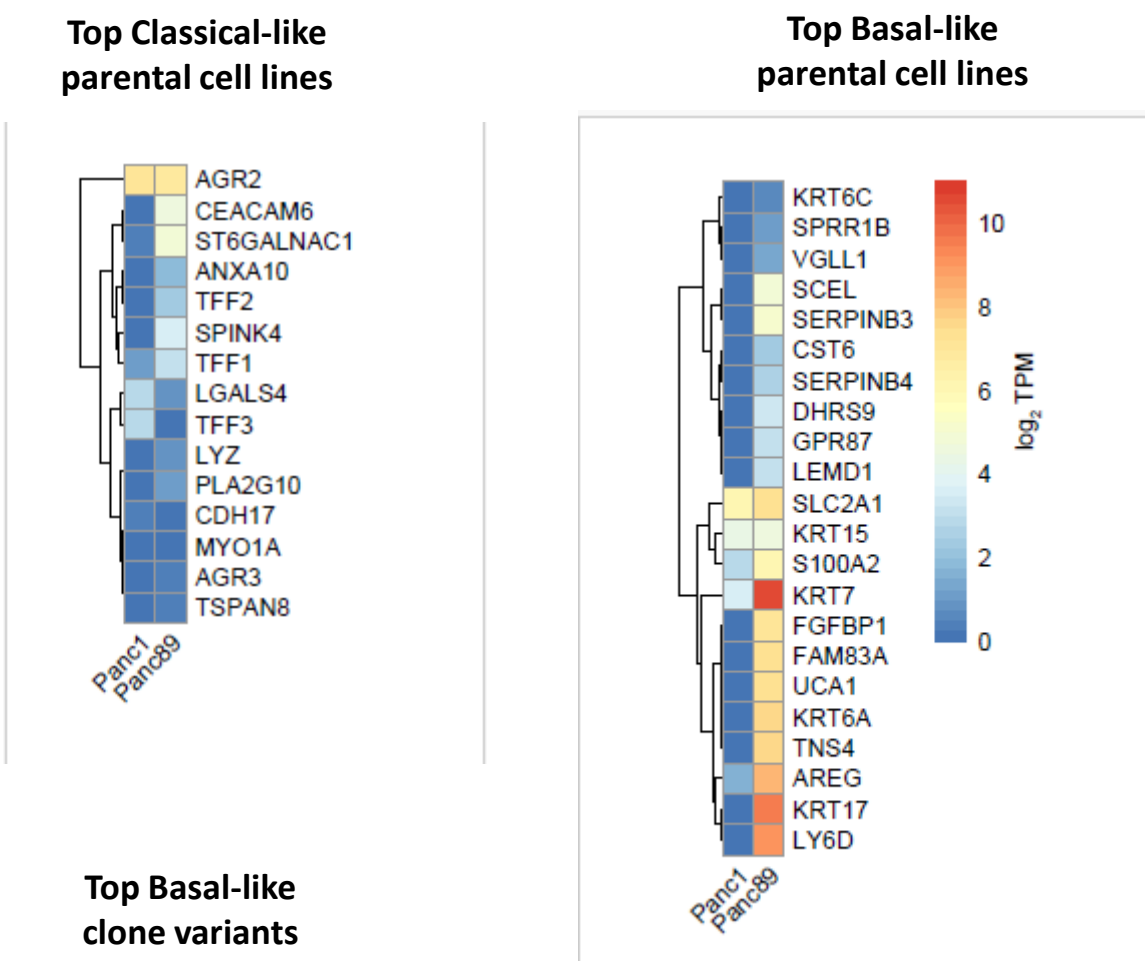

(E)

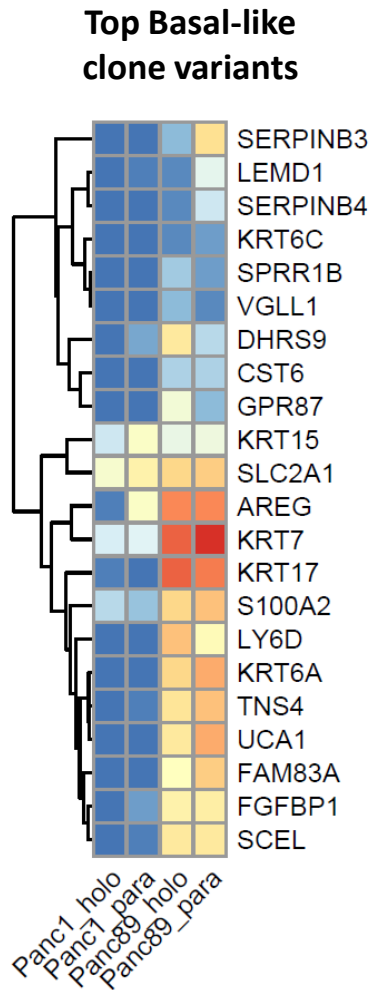

Supplementary Figure 1

Supplement: s1 [file s1]

### Adhesion to liver endothelium

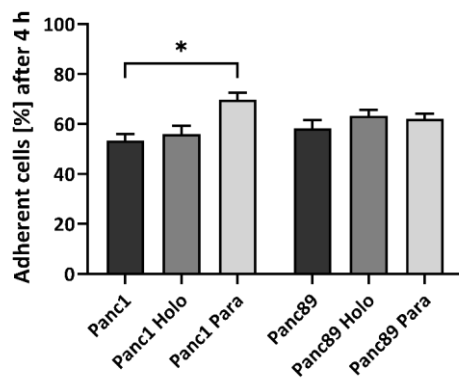

### Adhesion to lung endothelium

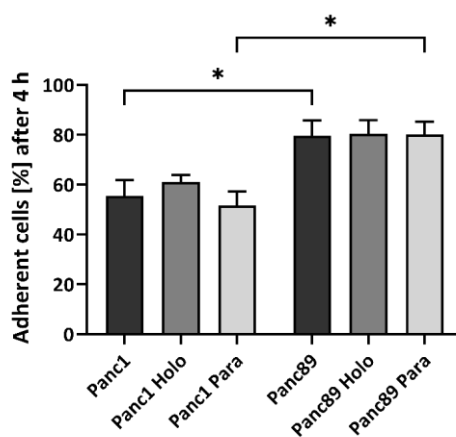

### Adhesion to mesothelial cells

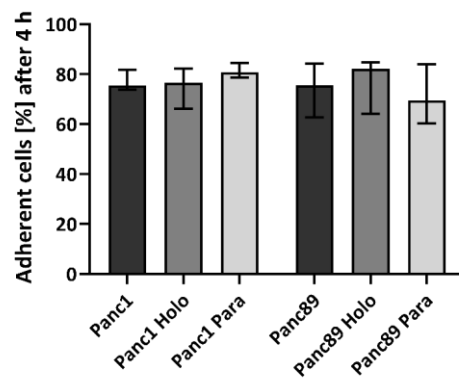

Supplement: s1 [file s1]
